# Supplementary material
Source: PubMed Central journal article supplement (PMC1852137)
Supplement: pbio.0050087.st001.pdf [file pbio.0050087.st001.pdf]

TABLE S1. Locality records for DNA sequences and morphometric measurements. For detailed explanation of collection ID, see Fontaneto, D., Herniou, E., Barraclough, T. G. & Ricci, C. (2006) *Zoological Studies* In press.

a) DNA sequences and Genbank accession numbers.

| Species                                            | Sample name   | Country | Locality               | Date     | Collection ID | Genebank code, cox1 | Genebank code, 28S |
|----------------------------------------------------|---------------|---------|------------------------|----------|---------------|---------------------|--------------------|
| <i>D. aculeata</i><br>(Ehrenberg, 1832)            | D.acul.IT     | Italy   | Alagna VC              | Jul 2004 | A341          | DQ656809            | DQ656758           |
| <i>D. aculeata crystallina</i><br>(Murray, 1908)   | D.acucry.FI   | Finland | Nuukio National Park   | Aug 2004 | NUP1          | DQ656808            | DQ656757           |
| <i>D. aculeata medioaculeata</i><br>(Janson, 1893) | D.acumed.BE   | Belgium | Bruges                 | Nov 2003 | BL2           | DQ656810            | DQ656759           |
| <i>D. macrostyla</i><br>(Ehrenberg, 1838)          | D.macr.FI     | Finland | Nuukio National Park   | Aug 2004 | NUP2          | DQ656812            | DQ656760           |
| <i>D. macrostyla tuberculata</i><br>(Gosse, 1886)  | D.macr.IT     | Italy   | Rassa VC               | Jul 2004 | A346          | DQ656811            |                    |
|                                                    | D.mactu.IT.1  | Italy   | Alagna VC              | Jul 2004 | A341          | DQ656813            | DQ656761           |
|                                                    | D.mactu.IT.2  | Italy   | Campertogno VC         | Oct 2004 | ARG1          | DQ656814            | DQ656762           |
|                                                    | D.mactu.UK    | UK      | New Forest, Hampshire  | Oct 2004 | NF5           | DQ656815            | DQ656763           |
| <i>R. citrina</i><br>(Ehrenberg, 1838)             | R.citr.IT.1.1 | Italy   | Novara NO              | Jul 2005 | A389          | DQ656871            |                    |
|                                                    | R.citr.IT.1.2 | Italy   | Novara NO              | Jul 2005 | A389          | DQ656870            |                    |
| <i>R. macrura</i><br>(Schrank, 1803)               | R.macr.IT.1.1 | Italy   | Fontaneto NO           | Aug 2004 | RM1           | DQ656816            | DQ656777           |
|                                                    | R.macr.IT.1.2 | Italy   | Fontaneto NO           | Feb 2004 | A327          | DQ656818            |                    |
|                                                    | R.macr.IT.2.1 | Italy   | Cavaglio NO            | Aug 2004 | RMAC          | DQ656817            | DQ656778           |
|                                                    | R.macr.IT.2.2 | Italy   | Cavaglio NO            | Feb 2004 | A328          | DQ656819            | DQ656774           |
|                                                    | R.macr.IT.3   | Italy   | Gattinara VC           | Mar 2005 | A371          | DQ656881            |                    |
|                                                    | R.macr.IT.4   | Italy   | San Bernardino CR      | Nov 2005 | A405          | DQ656872            |                    |
|                                                    | R.macr.UK.1.1 | UK      | New Forest, Hampshire  | Oct 2004 | NF8           | DQ656820            | DQ656776           |
|                                                    | R.macr.UK.1.2 | UK      | New Forest, Hampshire  | Oct 2004 | NF8           | DQ656821            | DQ656775           |
| <i>R. magnacalcarata</i><br>(Parsons, 1892)        | R.magn.UK.1   | UK      | Kew Garden             | Nov 2004 | KG3           | DQ656822            | DQ656769           |
|                                                    | R.magn.UK.2.1 | UK      | Silwood Park, Ascot    | Sep 2004 | S88           | DQ656826            | DQ656770           |
|                                                    | R.magn.UK.2.2 | UK      | Silwood Park, Ascot    | Sep 2004 | S88           | DQ656827            | DQ656771           |
|                                                    | R.magn.UK.2.3 | UK      | Silwood Park, Ascot    | Sep 2004 | S88           | DQ656828            | DQ656772           |
|                                                    | R.magn.IT.1.1 | Italy   | Borromeo, Fontaneto NO | Jun 2004 | A337          | DQ656824            |                    |

|                                            |               |          |                                            |          |         |          |          |
|--------------------------------------------|---------------|----------|--------------------------------------------|----------|---------|----------|----------|
|                                            | R.magn.IT.1.2 | Italy    | Borromeo,<br>Fontaneto NO                  | Jun 2004 | A337    | DQ656825 | DQ656767 |
|                                            | R.magn.IT.2   | Italy    | Serravalle<br>Sesia VC                     | Aug 2004 | A349    | DQ656829 |          |
|                                            | R.magn.IT.3   | Italy    | Fontanone,<br>Fontaneto NO                 | Dec 2004 | A362    | DQ656823 | DQ656768 |
| <i>R. neptunia</i><br>(Ehrenberg,<br>1832) | R.nept.DK     | Denmark  | Aalborg,<br>Jutland                        | Jul 2002 | Genbank | AY218094 |          |
|                                            | R.nept.FR     | France   | Vendee river,<br>Pays de Loire             | Sep 2003 | V2      | DQ656831 | DQ656779 |
|                                            | R.nept.IT     | Italy    | Gorgonzola<br>MI                           | Dec 2003 | A313    | DQ656830 | DQ656773 |
| <i>R. neptunoida</i><br>Harring, 1913      | R.noid.IT     | Italy    | Rossa VC                                   | May 2004 | A324    | DQ656856 |          |
| <i>R. rotatoria</i><br>(Pallas, 1766)      | R.rota.BE     | Belgium  | Bruges                                     | Nov 2003 | BL2     | DQ656832 | DQ656784 |
|                                            | R.rota.DK     | Denmark  | Copenhagen                                 | Apr 2001 | Genbank | AY218093 |          |
|                                            | R.rota.FR.1   | France   | Sully sur Loire                            | Jan 2004 | CH9     |          | DQ656756 |
|                                            | R.rota.FR.2.1 | France   | Languedoc -<br>Roussillon                  | Sep 2004 | SMV17   | DQ656840 | DQ656788 |
|                                            | R.rota.FR.2.2 | France   | Languedoc -<br>Roussillon                  | Sep 2004 | SMV17   |          | DQ656805 |
|                                            | R.rota.FR.2.3 | France   | Languedoc -<br>Roussillon                  | Sep 2004 | SMV18   | DQ656841 | DQ656789 |
|                                            | R.rota.IT.1.1 | Italy    | Campertogno<br>VC                          | Sep 2003 | RR1     | DQ656834 |          |
|                                            | R.rota.IT.1.2 | Italy    | Campertogno<br>VC                          | Oct 2003 | A305    | DQ656836 | DQ656780 |
|                                            | R.rota.IT.2   | Italy    | Rassa VC                                   | Jun 2004 | A336    | DQ656838 | DQ656782 |
|                                            | R.rota.IT.3   | Italy    | Verbania VB                                | Oct 2004 | IT2     |          | DQ656764 |
|                                            | R.rota.IT.4   | Italy    | Pond,<br>Fontaneto NO                      | Oct 2003 | Rrot    | DQ656835 |          |
|                                            | R.rota.IT.5   | Italy    | Gorgonzola<br>MI                           | Dec 2003 | A313    | DQ656837 | DQ656781 |
|                                            | R.rota.IT.6   | Italy    | Cavaglio NO                                | Dec 2004 | A363    | DQ656833 | DQ656783 |
|                                            | R.rota.IT.7   | Italy    | Sant'Agostino<br>Lake, Varallo<br>Sesia VC | May 2005 | A382    | DQ656876 |          |
|                                            | R.rota.IT.8   | Italy    | Novara NO                                  | Jul 2005 | A389    | DQ656877 |          |
|                                            | R.rota.IT.9   | Italy    | Agogna river,<br>Fontaneto NO              | Feb 2005 | A368    | DQ656878 |          |
|                                            | R.rota.IT.10  | Italy    | Marcurago di<br>Arona NO                   | May 2005 | A380    | DQ656879 |          |
|                                            | R.rota.IT.11  | Italy    | Verbania VB                                | Jul 2005 | A387    | DQ656880 |          |
|                                            | R.rota.MX     | Mexico   | Alverado,<br>Veracruz                      | Nov 2003 | MX5     | DQ656842 | DQ656786 |
|                                            | R.rota.TZ     | Tanzania | East Usambara                              | Sep 2003 | TZ2     | DQ656844 | DQ656790 |
|                                            | R.rota.TH     | Thailand | Koh Tan<br>Island                          | Apr 2005 | KS5     | DQ656843 | DQ656785 |
|                                            | R.rota.UK.1   | UK       | New Forest,<br>Hampshire                   | Feb 2003 | NF2     | DQ656861 |          |
|                                            | R.rota.UK.2.1 | UK       | New Forest,<br>Hampshire                   | Oct 2004 | NF5     | DQ656839 | DQ656787 |
|                                            | R.rota.UK.2.2 | UK       | New Forest,<br>Hampshire                   | Oct 2004 | NF5     | DQ656862 |          |
|                                            | R.rota.UK.2.3 | UK       | New Forest,<br>Hampshire                   | Oct 2004 | NF5     |          | DQ656766 |
|                                            | R.rota.UK.3.1 | UK       | Wisley, Surrey                             | Mar 2003 | W4      | DQ656863 | DQ656795 |
|                                            | R.rota.UK.3.2 | UK       | Wisley, Surrey                             | Mar 2003 | W4      | DQ656864 |          |

|                                              |               |                          |                                            |          |          |          |          |
|----------------------------------------------|---------------|--------------------------|--------------------------------------------|----------|----------|----------|----------|
|                                              | R.rota.UK.3.3 | UK                       | Wisley, Surrey                             | Mar 2003 | W4       | DQ656865 | DQ656796 |
|                                              | R.rota.UK.3.4 | UK                       | Wisley, Surrey                             | Mar 2003 | W4       | DQ656866 | DQ656797 |
|                                              | R.rota.UK.3.5 | UK                       | Wisley, Surrey                             | Mar 2003 | W4       | DQ656867 |          |
|                                              | R.rota.UK.3.6 | UK                       | Wisley, Surrey                             | Mar 2003 | W4       |          | DQ656807 |
| <i>R. socialis</i><br>(Kellicott, 1888)      | R.soci.IT.1   | Italy                    | Borrromeo,<br>Fontaneto NO                 | Jun 2004 | A337     | DQ656845 | DQ656798 |
|                                              | R.soci.IT.2.1 | Italy                    | Fontanone,<br>Fontaneto NO                 | Aug 2004 | A344     | DQ656846 | DQ656799 |
|                                              | R.soci.IT.2.2 | Italy                    | Fontanone,<br>Fontaneto NO                 | Dec 2004 | A362     | DQ656849 |          |
|                                              | R.soci.IT.3   | Italy                    | Serravalle<br>Sesia VC                     | Aug 2004 | A349     | DQ656848 |          |
|                                              | R.soci.UK     | UK                       | Silwood Park,<br>Ascot                     | Oct 2004 | S88      | DQ656847 | DQ656800 |
| <i>R. sordida</i><br>(Western, 1893)         | R.sord.AU     | Australia                | Lamington                                  | Aug 2004 | OZ4      | DQ656853 | DQ656794 |
|                                              | R.sord.CH     | Switzerland              | Neuchatel                                  | Sep 2003 | SW11     | DQ656854 |          |
|                                              | R.sord.FR.1   | France                   | les Sables<br>d'Olonnes,<br>Pays de Loire  | Aug 2003 | P10      | DQ656850 | DQ656793 |
|                                              | R.sord.FR.2   | France                   | Languedoc -<br>Roussillon                  | Feb 2004 | SMV13    | DQ656855 |          |
|                                              | R.sord.IT.1   | Italy                    | Borrromeo,<br>Fontaneto NO                 | Jun 2004 | A338     | DQ656852 | DQ656792 |
|                                              | R.sord.IT.2.1 | Italy                    | Sant'Agostino<br>Lake, Varallo<br>Sesia VC | May 2005 | A384     | DQ656873 |          |
|                                              | R.sord.IT.2.2 | Italy                    | Sant'Agostino<br>Lake, Varallo<br>Sesia VC | May 2005 | A384     | DQ656874 |          |
|                                              | R.sord.IT.2.3 | Italy                    | Sant'Agostino<br>Lake, Varallo<br>Sesia VC | May 2005 | A384     | DQ656875 |          |
|                                              | R.sord.SW     | Sweden                   | Stockholm                                  | Oct 2004 | ST1      |          | DQ656806 |
| R.sord.TZ                                    | Tanzania      | East Usambara            | Sep 2003                                   | A314     | DQ656851 | DQ656791 |          |
| R.sord.UK                                    | UK            | New Forest,<br>Hampshire | Oct 2004                                   | NF15     |          | DQ656765 |          |
| <i>R. tardigrada</i><br>(Ehrenberg,<br>1832) | R.tard.FI     | Finland                  | Nuukio<br>National Park                    | Aug 2004 | NUP2     | DQ656860 | DQ656803 |
|                                              | R.tard.IT.1   | Italy                    | Piode VC                                   | Aug 2004 | A348     | DQ656857 | DQ656801 |
|                                              | R.tard.IT.2   | Italy                    | Verbania VB                                | Oct 2004 | IT1      | DQ656858 | DQ656802 |
|                                              | R.tard.IT.3   | Italy                    | Mercurago di<br>Arona NO                   | May 2005 | A376     | DQ656869 |          |
|                                              | R.tard.IT.4   | Italy                    | Sant'Agostino<br>Lake, Varallo<br>Sesia VC | May 2005 | A382     | DQ656868 |          |
|                                              | R.tard.UK     | UK                       | New Forest,<br>Hampshire                   | Oct 2004 | NF5      | DQ656859 |          |
|                                              | R.tard.US     | USA                      | Jamaica plain,<br>Boston MA                | Nov 2004 | BO1      | DQ656882 | DQ656804 |

b) SEM and morphometric measurements. Individuals were measured from population samples from the field (P) or clonal samples derived from a single wild individual (C). Population sample names match those for DNA sequences derived from the same population, e.g. macrIT1 is a sample from the same population as the sequence R.macr.IT.1.

| species                                  | Sample name   | locality  | date     | # SEM measured | C/P |
|------------------------------------------|---------------|-----------|----------|----------------|-----|
| <i>R. macrura</i> (Schrank, 1803)        | macrIT1       | Italy     | Dec 2003 | 15             | P   |
|                                          | macrIT2       | Italy     | Aug 2004 | 12             | P   |
|                                          | macrIT3       | Italy     | Mar 2005 | 9              | P   |
| <i>R. magnacalcarata</i> (Parsons, 1892) | R.macr.UK.1   | UK        | Oct 2004 | 18             | C   |
|                                          | magnIT1       | Italy     | Jun 2004 | 7              | P   |
|                                          | magnIT2       | Italy     | Aug 2004 | 16             | P   |
|                                          | magnIT3       | Italy     | Dec 2004 | 8              | P   |
| <i>R. neptunia</i> (Ehrenberg, 1832)     | R.magn.UK.2.1 | UK        | Oct 2004 | 12             | C   |
|                                          | R.nept.IT     | Italy     | Dec 2003 | 23             | C   |
| <i>R. neptunoida</i> Harring, 1913       | noidIT        | Italy     | May 2004 | 12             | P   |
| <i>R. rotatoria</i> (Pallas, 1766)       | R.rota.FR.2.1 | France    | Sep 2004 | 11             | C   |
|                                          | R.rota.IT.5   | Italy     | Dec 2003 | 12             | C   |
|                                          | R.rota.UK.2.2 | UK        | Oct 2004 | 14             | C   |
| <i>R. socialis</i> (Kellicott, 1888)     | sociIT1       | Italy     | Jun 2004 | 9              | P   |
|                                          | sociIT2       | Italy     | Aug 2004 | 17             | P   |
|                                          | sociIT3       | Italy     | Aug 2004 | 23             | P   |
|                                          | R.soci.UK     | UK        | Oct 2004 | 16             | C   |
| <i>R. sordida</i> (Western, 1893)        | sordAU        | Australia | Aug 2004 | 8              | P   |
|                                          | sordIT1       | Italy     | Jun 2004 | 12             | P   |
|                                          | sordIT2       | Italy     | May 2005 | 14             | P   |
| <i>R. tardigrada</i> (Ehrenberg, 1832)   | tardIT1       | Italy     | Aug 2004 | 24             | P   |
|                                          | tardIT3       | Italy     | May 2005 | 19             | P   |
|                                          | R.tard.US     | USA       | Nov 2004 | 15             | C   |
