# Supplementary material
Source: PubMed Central journal article supplement (PMC1852137)
Supplement: pbio.0050087.st002.pdf [file pbio.0050087.st002.pdf]

TABLE S2. Traditional characteristics used to distinguish *Rotaria* species. Data from Donner, J. (1965) *Rotifers* (Akademie-Verlag, Berlin) and Ricci, C. (1998) *Hydrobiologia* **388**, 321-326.

| Species        | body length<br>(micron) | foot         | spurs  | toes  | rostrum | eyes    | detritus on trunk | wet habitat | dry habitat | benthos | plankton | epibiont | running water | lakes and ponds | anhydrobiotic<br>capabilities     |
|----------------|-------------------------|--------------|--------|-------|---------|---------|-------------------|-------------|-------------|---------|----------|----------|---------------|-----------------|-----------------------------------|
| citrina        | 600-1000                | short        | short  | short | short   | present | no                | x           |             | x       |          |          |               | x               | unknown,<br>but plausibly<br>poor |
| macrura        | 600-800                 | long         | short  | short | long    | present | no                | x           |             | x       | x        |          |               | x               | unknown,<br>but plausibly<br>poor |
| magnacalcarata | 600-800                 | long<br>very | long   | short | short   | absent  | no                | x           |             | x       |          | x        |               | x               | unknown,<br>but plausibly<br>poor |
| neptunia       | 700-1600                | long         | short  | long  | short   | present | no                | x           |             | x       |          |          |               | x               | bad<br>quite good                 |
| neptunoida     | 400-1000                | long         | short  | long  | long    | present | no                | x           |             | x       |          |          |               | x               | in embryos                        |
| rotatoria      | 230-1090                | medium       | short  | short | short   | present | no                | x           |             | x       | x        |          | x             | x               | bad<br>unknown,<br>but plausibly  |
| socialis       | 350-650                 | long         | medium | short | short   | absent  | no                | x           |             | x       |          | x        |               | x               | poor                              |
| sordida        | 340-650                 | short        | long   | short | long    | absent  | yes               | x           | x           | x       |          |          |               | x               | good                              |
| tardigrada     | 363-700                 | short        | long   | long  | long    | present | yes               | x           |             | x       |          |          |               | x               | good                              |
