# Supplementary material
Source: PubMed Central journal article supplement (PMC1852137)
Supplement: pbio.0050087.st003.pdf [file pbio.0050087.st003.pdf]

TABLE S3. Discriminant analysis of trophi shape. The analysis is based on the first five PCs (total variance explained: PC1, 51.75%; PC2, 19.91%; PC3, 12.31%; PC4, 8.18%; PC5, 4.94%). Cell entries show the percentage of animals from the population in column heading classified as belong to the population given by the row name. Specimens correctly classified at population level fall along the diagonal; specimens correctly classified at species level fall within the rectangular boxes; all other specimens are misclassified by the analysis. For example 58% of macrIT2 individuals were correctly classified to population, whereas 25% were classified as belonging to macrIT1.

|               | macrIT2 | macrIT3 | macrIT1 | R.macr.U<br>K.1 | magnIT1 | magnIT2 | magnIT3 | R.magn.U<br>K.2.1 | R.nept.IT | noidIT | R.rota.IT.5 | R.rota.UK.<br>2.2 | R.rota.FR.<br>2.1 | sociIT1 | sociIT3 | sociIT2 | R.soci.UK | sordIT1 | sordIT2 | sordAU | tardIT1 | tardIT3 | R.tard.US |
|---------------|---------|---------|---------|-----------------|---------|---------|---------|-------------------|-----------|--------|-------------|-------------------|-------------------|---------|---------|---------|-----------|---------|---------|--------|---------|---------|-----------|
| macrIT2       | 58      | 0       | 25      | 8               | 0       | 0       | 0       | 0                 | 0         | 0      | 0           | 0                 | 0                 | 0       | 0       | 0       | 0         | 0       | 0       | 0      | 0       | 8       | 0         |
| macrIT3       | 0       | 67      | 33      | 0               | 0       | 0       | 0       | 0                 | 0         | 0      | 0           | 0                 | 0                 | 0       | 0       | 0       | 0         | 0       | 0       | 0      | 0       | 0       | 0         |
| macrIT1       | 7       | 13      | 67      | 13              | 0       | 0       | 0       | 0                 | 0         | 0      | 0           | 0                 | 0                 | 0       | 0       | 0       | 0         | 0       | 0       | 0      | 0       | 0       | 0         |
| R.macr.UK.1   | 0       | 11      | 17      | 72              | 0       | 0       | 0       | 0                 | 0         | 0      | 0           | 0                 | 0                 | 0       | 0       | 0       | 0         | 0       | 0       | 0      | 0       | 0       | 0         |
| magnIT1       | 0       | 0       | 0       | 0               | 43      | 14      | 0       | 14                | 0         | 0      | 0           | 0                 | 0                 | 14      | 0       | 0       | 14        | 0       | 0       | 0      | 0       | 0       | 0         |
| magnIT2       | 0       | 0       | 0       | 0               | 6       | 19      | 13      | 19                | 0         | 0      | 6           | 0                 | 6                 | 0       | 6       | 19      | 6         | 0       | 0       | 0      | 0       | 0       | 0         |
| magnIT3       | 0       | 0       | 0       | 0               | 0       | 0       | 63      | 13                | 0         | 0      | 0           | 0                 | 0                 | 13      | 13      | 0       | 0         | 0       | 0       | 0      | 0       | 0       | 0         |
| R.magn.UK.2.1 | 0       | 0       | 0       | 0               | 0       | 8       | 8       | 42                | 0         | 0      | 8           | 0                 | 0                 | 0       | 17      | 17      | 0         | 0       | 0       | 0      | 0       | 0       | 0         |
| R.nept.IT     | 0       | 0       | 0       | 0               | 0       | 0       | 0       | 0                 | 91        | 0      | 0           | 0                 | 0                 | 0       | 0       | 0       | 0         | 4       | 4       | 0      | 0       | 0       | 0         |
| noidIT        | 0       | 0       | 0       | 0               | 0       | 0       | 0       | 0                 | 0         | 100    | 0           | 0                 | 0                 | 0       | 0       | 0       | 0         | 0       | 0       | 0      | 0       | 0       | 0         |
| R.rota.IT.5   | 0       | 0       | 0       | 0               | 0       | 8       | 8       | 0                 | 0         | 0      | 58          | 0                 | 8                 | 8       | 0       | 8       | 0         | 0       | 0       | 0      | 0       | 0       | 0         |
| R.rota.UK.2.2 | 0       | 0       | 0       | 0               | 0       | 0       | 0       | 0                 | 0         | 0      | 0           | 100               | 0                 | 0       | 0       | 0       | 0         | 0       | 0       | 0      | 0       | 0       | 0         |
| R.rota.FR.2.1 | 0       | 0       | 0       | 0               | 0       | 0       | 0       | 0                 | 0         | 0      | 9           | 0                 | 18                | 9       | 18      | 9       | 27        | 9       | 0       | 0      | 0       | 0       | 0         |
| sociIT1       | 0       | 0       | 0       | 0               | 0       | 0       | 0       | 0                 | 0         | 0      | 11          | 0                 | 11                | 44      | 22      | 0       | 11        | 0       | 0       | 0      | 0       | 0       | 0         |
| sociIT3       | 0       | 0       | 0       | 0               | 13      | 4       | 0       | 13                | 0         | 0      | 4           | 4                 | 9                 | 4       | 26      | 4       | 9         | 0       | 9       | 0      | 0       | 0       | 0         |
| sociIT2       | 0       | 0       | 0       | 0               | 6       | 0       | 0       | 6                 | 0         | 0      | 0           | 6                 | 0                 | 0       | 24      | 53      | 6         | 0       | 0       | 0      | 0       | 0       | 0         |
| R.soci.UK     | 0       | 0       | 0       | 0               | 6       | 0       | 0       | 13                | 0         | 0      | 0           | 0                 | 25                | 0       | 6       | 13      | 38        | 0       | 0       | 0      | 0       | 0       | 0         |
| sordIT1       | 0       | 0       | 0       | 0               | 0       | 0       | 0       | 0                 | 0         | 0      | 0           | 0                 | 0                 | 0       | 0       | 0       | 0         | 67      | 25      | 8      | 0       | 0       | 0         |
| sordIT2       | 0       | 0       | 0       | 0               | 0       | 0       | 0       | 0                 | 0         | 0      | 0           | 0                 | 0                 | 0       | 0       | 0       | 0         | 29      | 64      | 0      | 7       | 0       | 0         |
| sordAU        | 0       | 0       | 0       | 0               | 0       | 0       | 0       | 0                 | 0         | 0      | 0           | 0                 | 0                 | 0       | 0       | 0       | 0         | 0       | 0       | 100    | 0       | 0       | 0         |
| tardIT1       | 0       | 0       | 0       | 0               | 0       | 0       | 0       | 0                 | 0         | 0      | 0           | 0                 | 0                 | 0       | 0       | 0       | 0         | 0       | 4       | 0      | 63      | 13      | 21        |
| tardIT3       | 0       | 0       | 0       | 0               | 0       | 0       | 0       | 0                 | 0         | 0      | 0           | 0                 | 0                 | 0       | 0       | 0       | 0         | 0       | 0       | 0      | 5       | 90      | 5         |
| R.tard.US     | 0       | 0       | 0       | 0               | 0       | 0       | 0       | 0                 | 0         | 0      | 0           | 0                 | 0                 | 0       | 0       | 0       | 0         | 0       | 0       | 0      | 13      | 13      | 73        |
