# Supplementary material
Source: PubMed Central journal article supplement (PMC1852137)
Supplement: pbio.0050087.st004.pdf [file pbio.0050087.st004.pdf]

TABLE S4. Comparison of models of single versus multiple independently evolving entities within *Rotaria*. Analyses were repeated on tree obtained from the combined and separate gene partitions in turn. The independent evolution model included 5 free parameters: the threshold genetic distance,  $T$ , from the present defining the transition from between entity to within entity branching, and separate branching rates,  $\lambda_1$  and  $\lambda_2$ , and scaling parameters,  $p_1$  and  $p_2$ , for branching between and within entities respectively. The null model includes 2 free parameters. The number of inferred independently evolving entities represented in the sample, and the number of those that are represented by single individuals, are shown with confidence limits within 2 log likelihoods of the maximum presented in brackets. The cluster provides a significantly better fit to the data for the combined and *cox1* trees in log likelihood ratio tests with three degrees of freedom, \* indicates  $p < 0.05$ , \*\*\* indicates  $p < 0.0001$

| Tree            | Model       | Log likelihood | T Subs/site | $\lambda_1$ | $\lambda_2$ | $p_1$ | $p_2$ | # of independent entities | # of entities with > 1 individual sampled |
|-----------------|-------------|----------------|-------------|-------------|-------------|-------|-------|---------------------------|-------------------------------------------|
| Combined        | Null        | 311.6          |             | 3.02        |             | 0.60  |       | 1                         | 0                                         |
|                 | Clusters*** | 327.0          | 0.045       | 10.3        | 108.8       | 0.64  | 0.00  | 43 (41-45)                | 13 (13-13)                                |
| <i>cox1</i>     | Null        | 257.8          |             | 3.04        |             | 0.56  |       | 1                         | 0                                         |
|                 | Clusters*** | 282.4          | 0.041       | 16.7        | 106.2       | 0.37  | 0.00  | 38 (37-40)                | 13 (13-13)                                |
| <i>28S rDNA</i> | Null        | 162.3          |             | 7.9         |             | 0.45  |       | 1                         | 0                                         |
|                 | Clusters    | 162.7          | 0.144       | 0.14        | 9.9         | 7.9   | 0.41  | 2 (1-21)                  | 2 (1-8)                                   |
