# Supplementary material
Source: PubMed Central journal article supplement (PMC1852137)
Supplement: pbio.0050087.st005.pdf [file pbio.0050087.st005.pdf]

TABLE S5. Evolutionary rates of changes in trophi size and shape within and between clusters and species. Rates were reconstructed on the combined analysis tree topology with branch lengths optimized as synonymous substitutions per codon. Results using other combinations of topology and branch lengths are qualitatively the same. Model 1 represents a single rate across tree ( $\beta_1$ ), model 2 represents a different rate within taxonomic species ( $\beta_1$ ) and between them ( $\beta_2$ ), model 3 represents a different rate within clusters ( $\beta_1$ ) and between them ( $\beta_2$ ), and model 4 represents different rates within clusters ( $\beta_1$ ), between clusters within a taxonomic species ( $\beta_2$ ) and between taxonomic species ( $\beta_3$ ). Units are variance in trait per unit branch length. Confidence limits on parameter estimates from solutions within 2 log likelihood units of the maximum likelihood solution are shown. The preferred model for each trait is indicated by asterisks, with \* indicating  $p < 0.05$ , \*\* for  $p < 0.01$ , \*\*\* for  $p < 0.001$  compared to the most likely nested model in log likelihood ratio tests.

| Trait | Model | Log likelihood | $\beta_1$       | $\beta_2$       | $\beta_3$     |
|-------|-------|----------------|-----------------|-----------------|---------------|
| Size  | 1     | 75.2           | 0.012±0.004     |                 |               |
|       | 2 **  | 78.7           | 0.006±0.003     | 0.031±0.015     |               |
|       | 3     | 78.4           | 0.0044±0.0014   | 0.016±0.0061    |               |
|       | 4     | 79.1           | 0.0044±0.0018   | 0.0071±0.0025   | 0.029±0.010   |
| PC1   | 1     | 106.2          | 0.0030±0.0011   |                 |               |
|       | 2     | 108.7          | 0.0054±0.0023   | 0.00074±0.00023 |               |
|       | 3     | 110.4          | 0.0058±0.0028   | 0.0016±0.0003   |               |
|       | 4 *** | 123.4          | 0.0058±0.0022   | 0.00008±0.00003 | 0.0043±0.0009 |
| PC2   | 1     | 140.6          | 0.0006±0.0002   |                 |               |
|       | 2     | 143.1          | 0.00038±0.00014 | 0.0011±0.0002   |               |
|       | 3     | 140.6          | 0.00058±0.0003  | 0.00063±0.00012 |               |
|       | 4 *   | 145.7          | 0.00059±0.00026 | 0.00016±0.00007 | 0.0011±0.0003 |
