# Supplementary material
Source: PubMed Central journal article supplement (PMC1852137)
Supplement: pbio.0050087.st006.pdf [file pbio.0050087.st006.pdf]

TABLE S6. The effects of sampling type (clonal versus population sample) on the mean and variance of size and shape of trophi within each sample.

a) Nested analysis of variance with sampling type as fixed effect and species as random effect. Sampling type has non-significant effect on the mean value of the response variable in each case. There are 326 observations and 8 species groups in each case.

|               | terms         | coefficient | t     | p    |
|---------------|---------------|-------------|-------|------|
| Centroid size | intercept     | 3.1         | 41.3  | 0.00 |
|               | sampling type | -0.012      | -1.13 | 0.26 |
| PC1           | intercept     | -0.017      | -0.59 | 0.56 |
|               | sampling type | 0.0044      | 1.34  | 0.18 |
| PC2           | intercept     | 0.0030      | 0.18  | 0.86 |
|               | sampling type | -0.0091     | -1.43 | 0.15 |

b) Comparisons of analyses of variance with species as a random effect and either including or excluding sampling type as a nested random effect within species. In all cases, the more complex model is not a significantly better fit for the data, showing that sampling type has no significant effect on the variance in each response variable.

| Response      | N            | d.f. | Log likelihood | Log L ratio | p    |
|---------------|--------------|------|----------------|-------------|------|
| Centroid size | Species      | 3    | 384.9          | <0.00       | 1.0  |
|               | Species/type | 4    | 384.9          |             |      |
| PC1           | Species      | 3    | 759.62         | <0.00       | 1.0  |
|               | Species/type | 4    | 759.62         |             |      |
| PC2           | Species      | 3    | 549.9          | 1.15        | 0.28 |
|               | Species/type | 4    | 550.46         |             |      |

Analyses conducted in the R statistical programming language, using the "lme" function.
