# Supplementary material
Source: PubMed Central journal article supplement (PMC1852137)

Figure S1

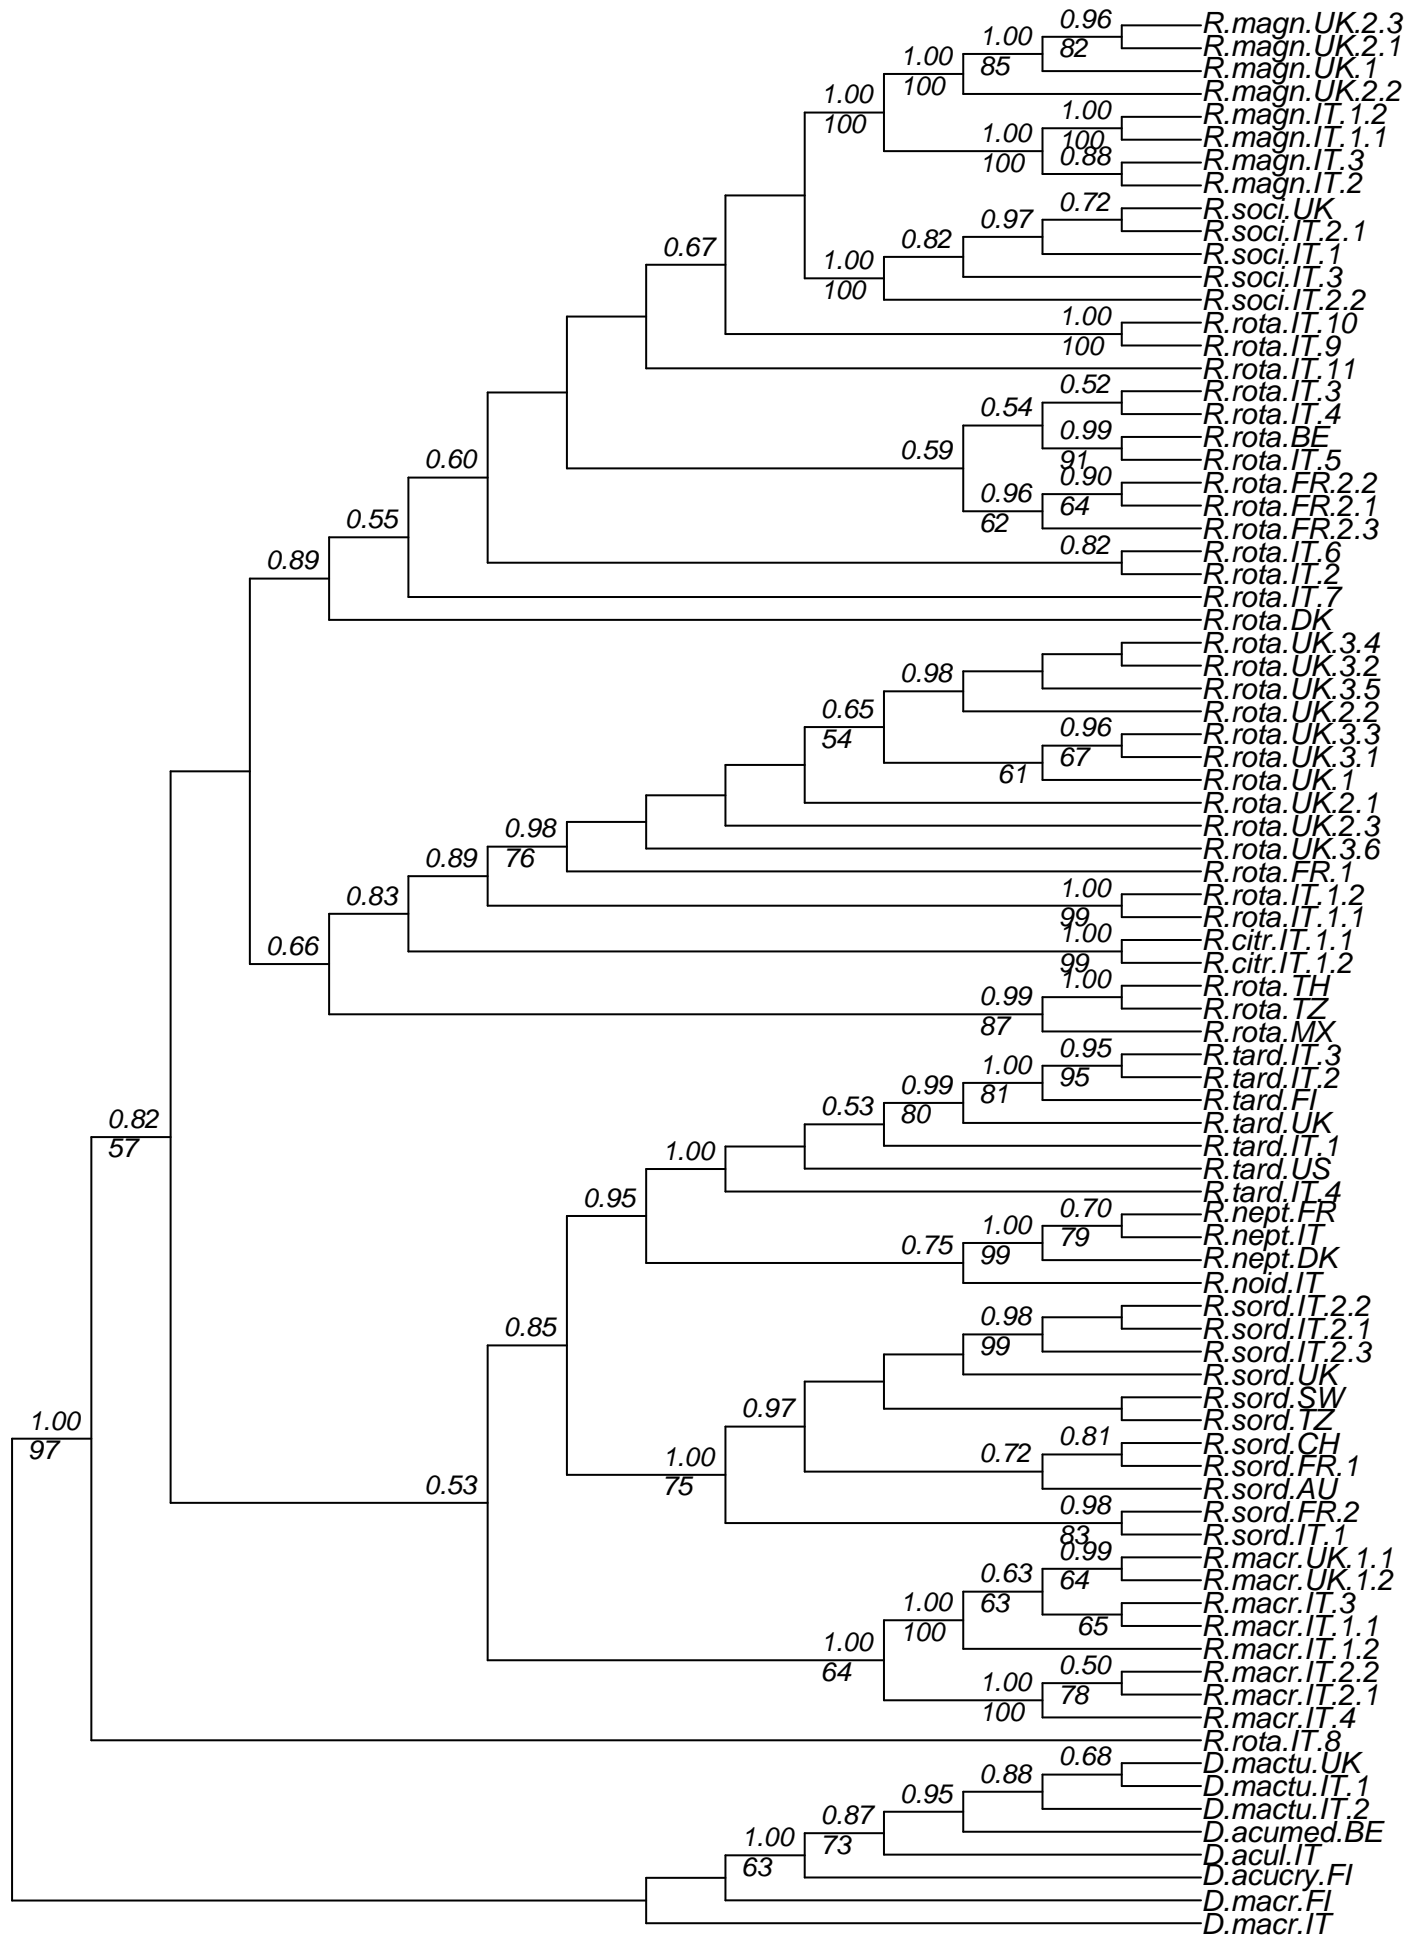

Supplement: pbio.0050087.sg001.pdf [file pbio.0050087.sg001.pdf]

Figure S2

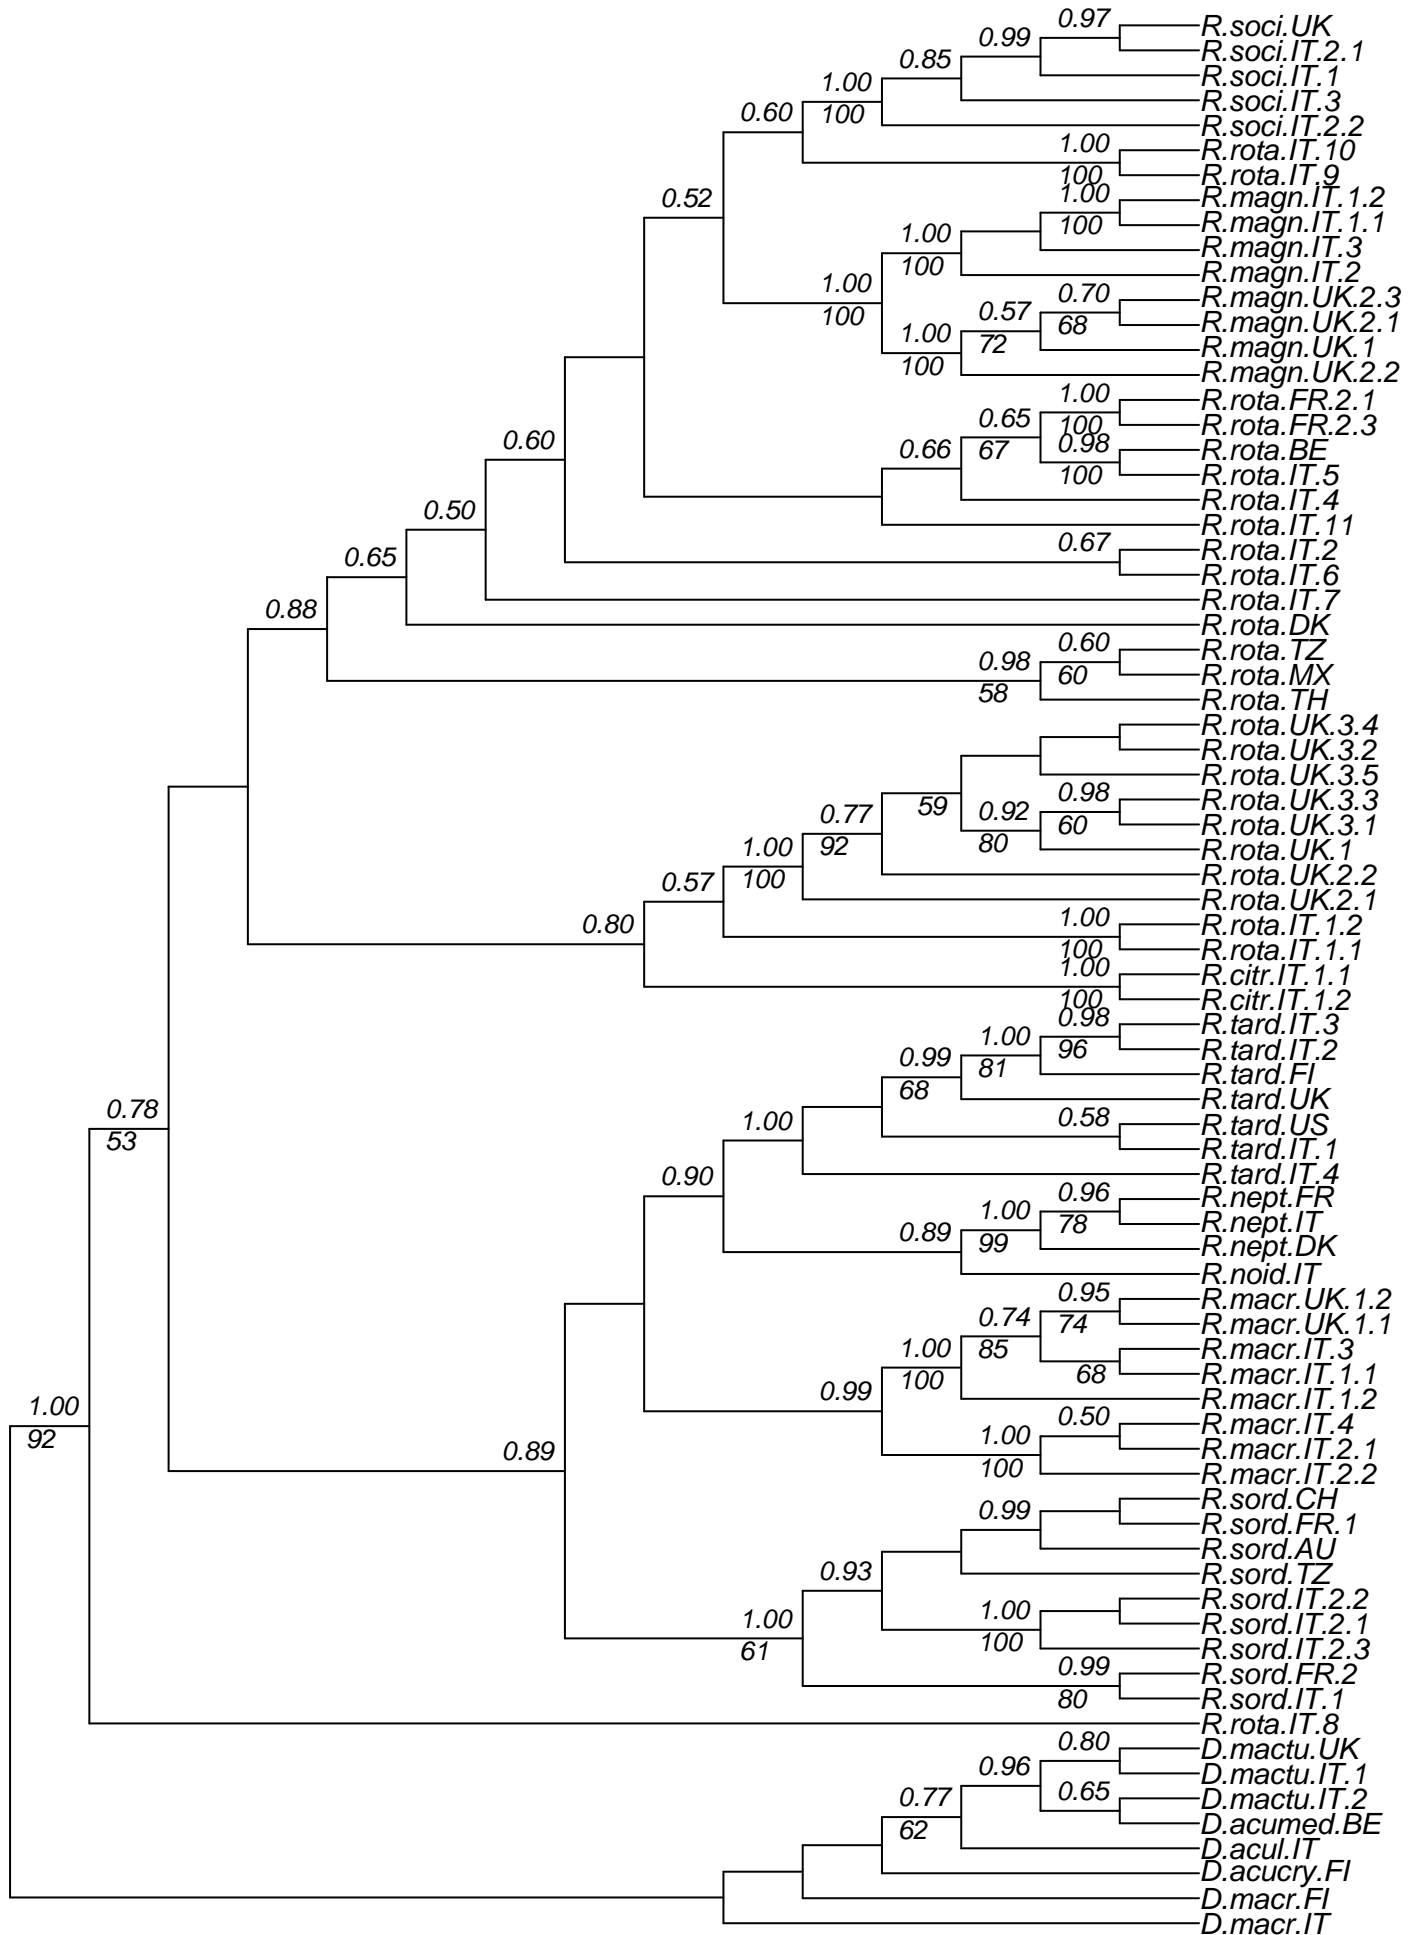

Supplement: pbio.0050087.sg002.pdf [file pbio.0050087.sg002.pdf]

Figure S3

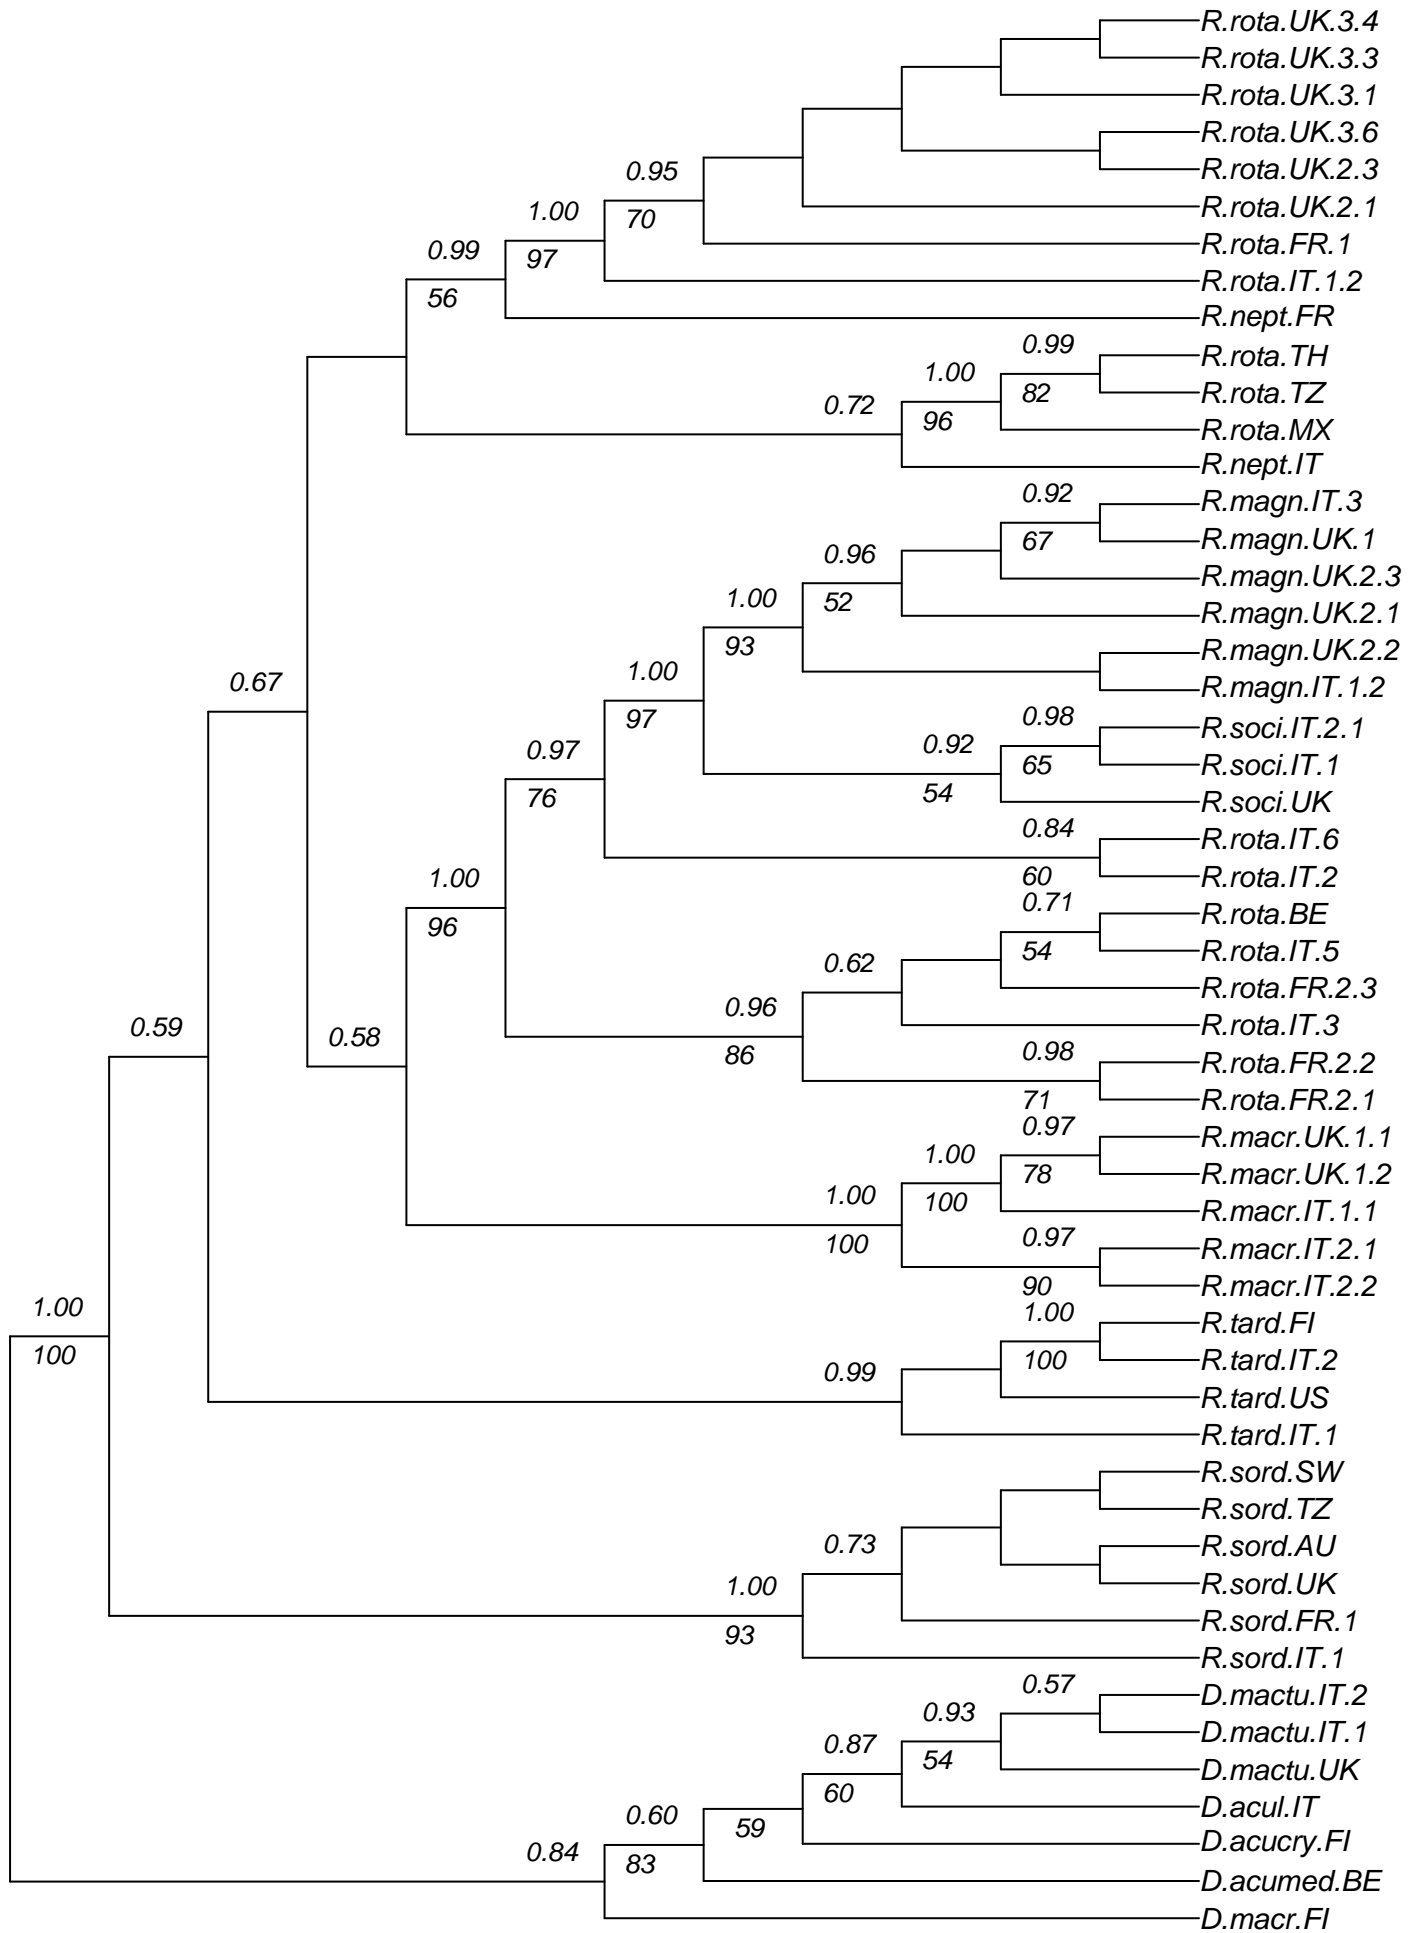

Supplement: pbio.0050087.sg003.pdf [file pbio.0050087.sg003.pdf]

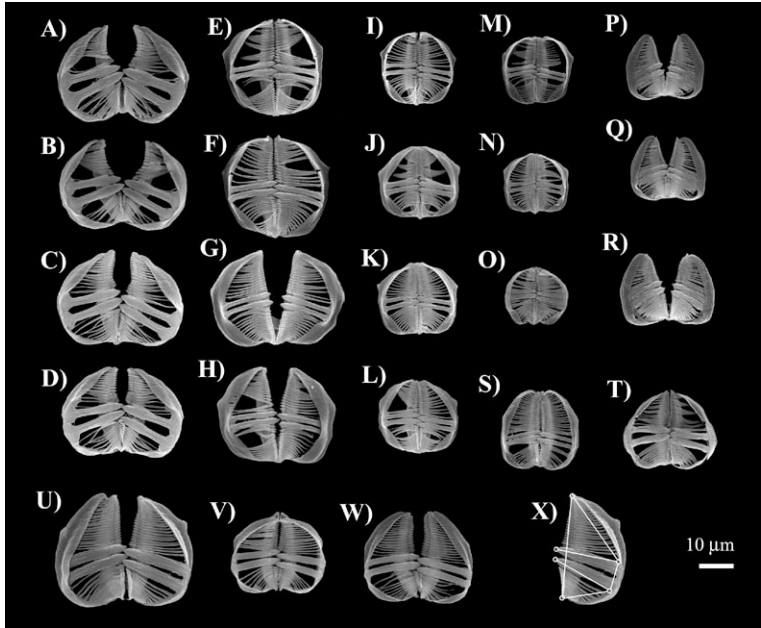

Supplement: pbio.0050087.sg004.pdf [file pbio.0050087.sg004.pdf]

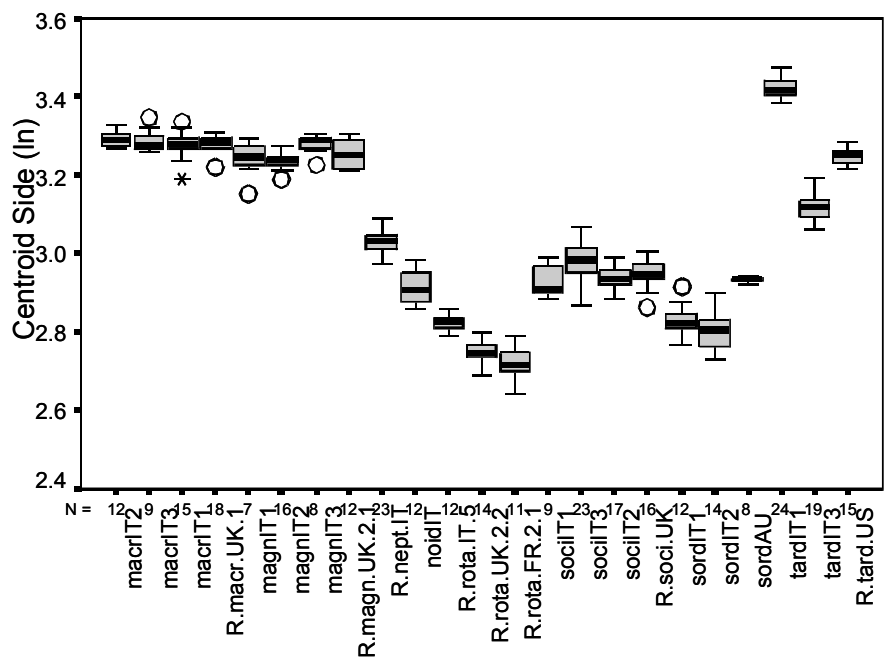

Supplement: pbio.0050087.sg005.pdf [file pbio.0050087.sg005.pdf]
